# Supplementary material for: Pitting of malaria parasites in microfluidic devices mimicking spleen interendothelial slits
Source: PubMed Central journal article supplement (PMC8585870; doi:10.1038/s41598-021-01568-w), 2021-11-11
Supplement: 41598_2021_1568_MOESM3_ESM.pdf [file 41598_2021_1568_MOESM3_ESM.pdf]

**SUPPLEMENTARY INFORMATION (Elizalde-Torrent, Trejo-Soto et al.)**

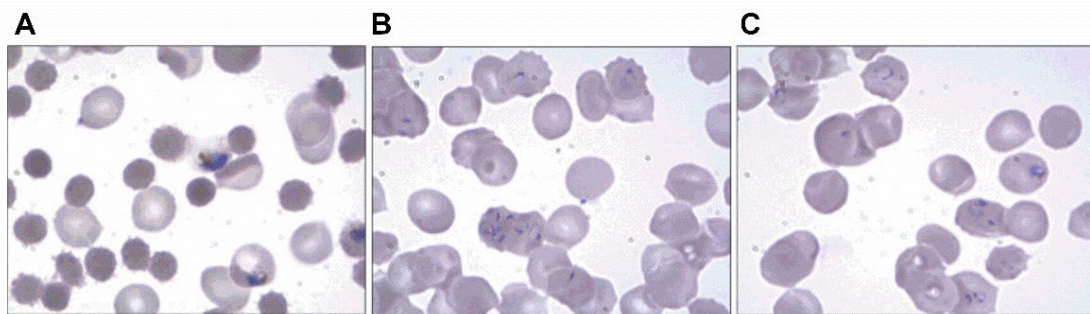

**Figure S1**

**Figure S1.** Light microscopy images of Giemsa stained *P.f.*-RBCs.

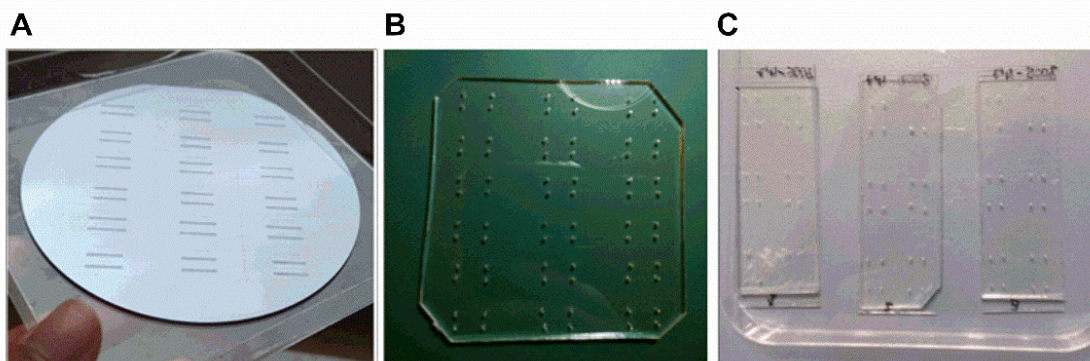

**Figure S2**

**Figure S2.** Microfluidic prototype devices images at different fabrication steps. (A) SU-8 mold on silicon wafer. (B) PDMS channel, after being peeled off the mold. (C) Microfluidic channels consisting of PDMS on glass.

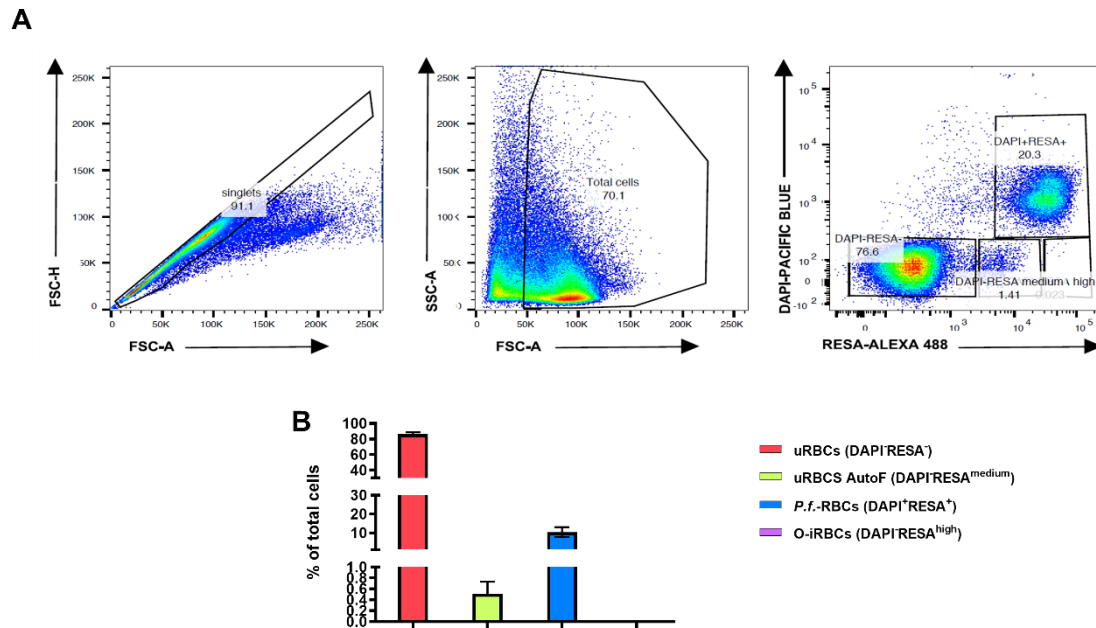

**Figure S3**

**Figure S3.** Pitting flow cytometry analysis. (A) Gating strategy used for flow cytometry analysis of *P.f.*-RBCs pitting. Singlets were selected by gating events in the diagonal of FSC-A vs FSC-H. Total cells were selected based on morphology in the FSC-A and SSC-A. Cell populations were defined as: uRBCs (DAPI<sup>-</sup>RESA<sup>-</sup>), autofluorescent uRBC (DAPI<sup>-</sup>RESA<sup>medium</sup>), *P.f.*-RBCs (DAPI<sup>+</sup>RESA<sup>+</sup>), O-iRBCs (DAPI<sup>-</sup>RESA<sup>high</sup>). (B) Quantification of frequencies of the above-mentioned populations in *P.f.*-RBCs before passing through the devices. Data represent the mean of seven independent experiments.

**MOVIE 1.** Pitting movie for device model 1.mp4. The video shows an iRBC undergoing the pitting process during the passage through a 2 μm slit of a model number 1 device (50 x 50 μm columns). The movie was obtained with a laser scanning confocal microscope (TCS-SP5; Leica Microsystems) at a magnification of 25.0× (water objective). The video was edited with ScreenCast-O-Matic (version 2.9.2).

**MOVIE 2.** Pitting movie for device model 2.mp4. The video shows an iRBC undergoing the pitting process during the passage through a 2 μm slit of a model number 2 device (10 x 10 μm columns). The movie was obtained with a laser scanning confocal microscope (TCS-SP5; Leica Microsystems) at a magnification of 25.0× (water objective). The video was edited with ScreenCast-O-Matic (version 2.9.2).
